# Supplementary material
Source: HighWire-hosted journal article supplement (https://jnm.snmjournals.org/highwire/filestream/94451/field_highwire_adjunct_files/0/117010_Supplemental_Data.pdf)
Supplement: 117010_Supplemental_Data.pdf [file 117010_Supplemental_Data.pdf]

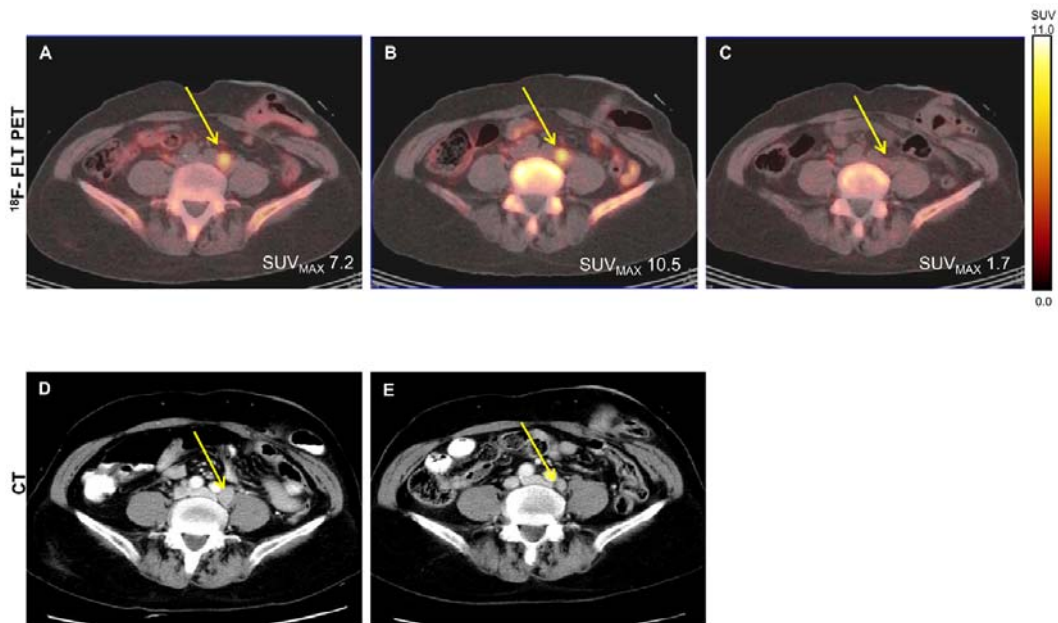

**Supplemental FIGURE 1.** A 61-year-old woman with partial response after three cycles of FOLFOX (Patient 11). Representative baseline (A) and day 2 [ $^{18}\text{F}$ ]FLT-PET images (B) showed an increase in  $\text{SUV}_{\text{MAX}}$  of the left common iliac metastatic lymph node from 7.2 to 10.5 during 5-FU infusion (45.8% change, low [ $^{18}\text{F}$ ]FLT flare).  $\text{SUV}_{\text{MAX}}$  after the completion of the first cycle (1.7) showed a marked decrease (–76.4% change, large [ $^{18}\text{F}$ ]FLT reduction) compared with the baseline value (C). Transverse computed tomography images before (D) and after FOLFOX (E) showed a 46% reduction in tumor size.
